# Supplementary material for: Rac1-NADPH oxidase signaling promotes CD36 activation under glucotoxic conditions in pancreatic beta cells
Source: PubMed Central journal article supplement — Redox Biol. 2016 Nov 23;11:126–34. doi: 10.1016/j.redox.2016.11.009 (PMC5133656; doi:10.1016/j.redox.2016.11.009), 2016-11-23

**Supplemental figure-1**

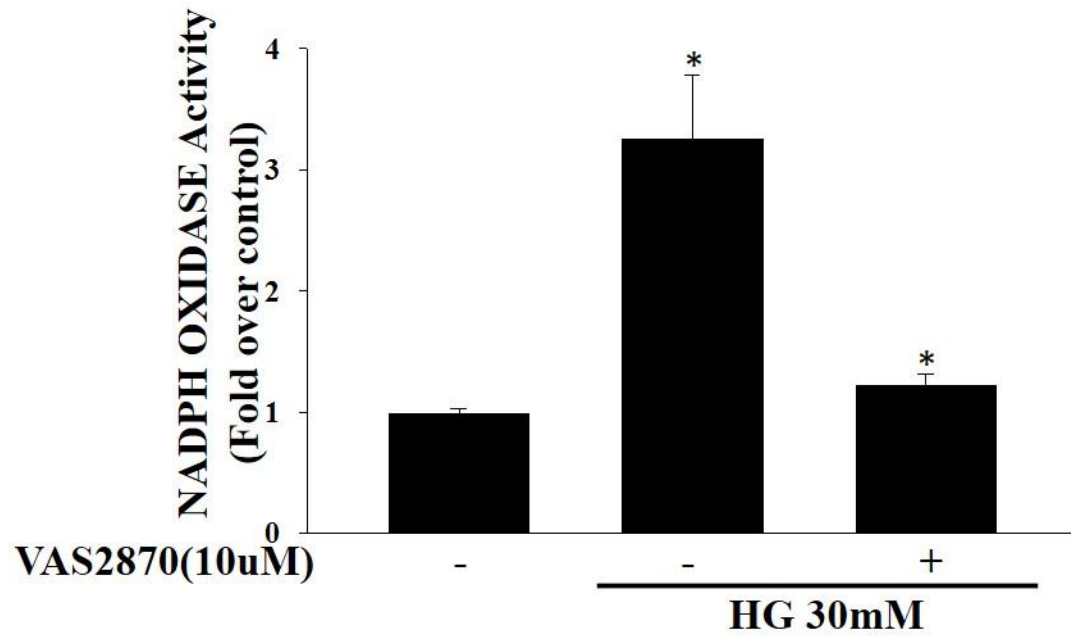

**Supplemental figure-2**

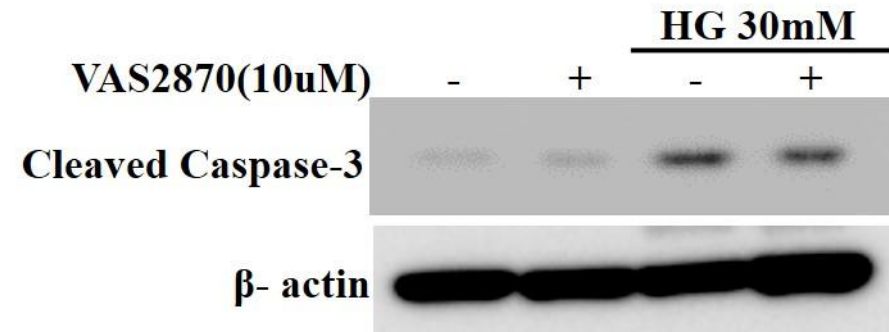

**Supplemental figure-3**

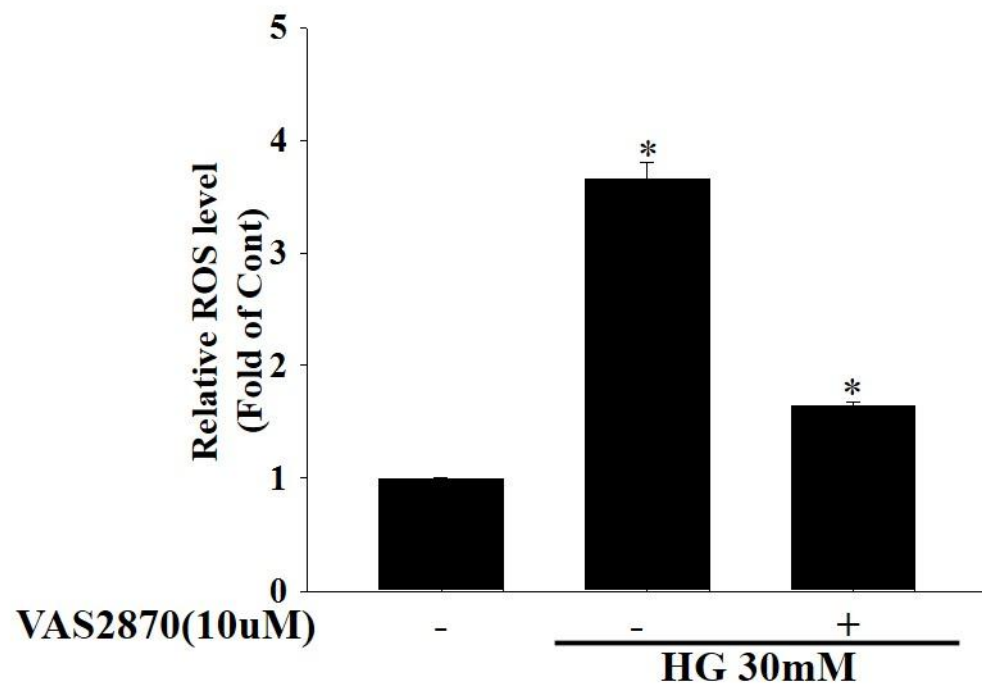

**Supplemental figure-4**

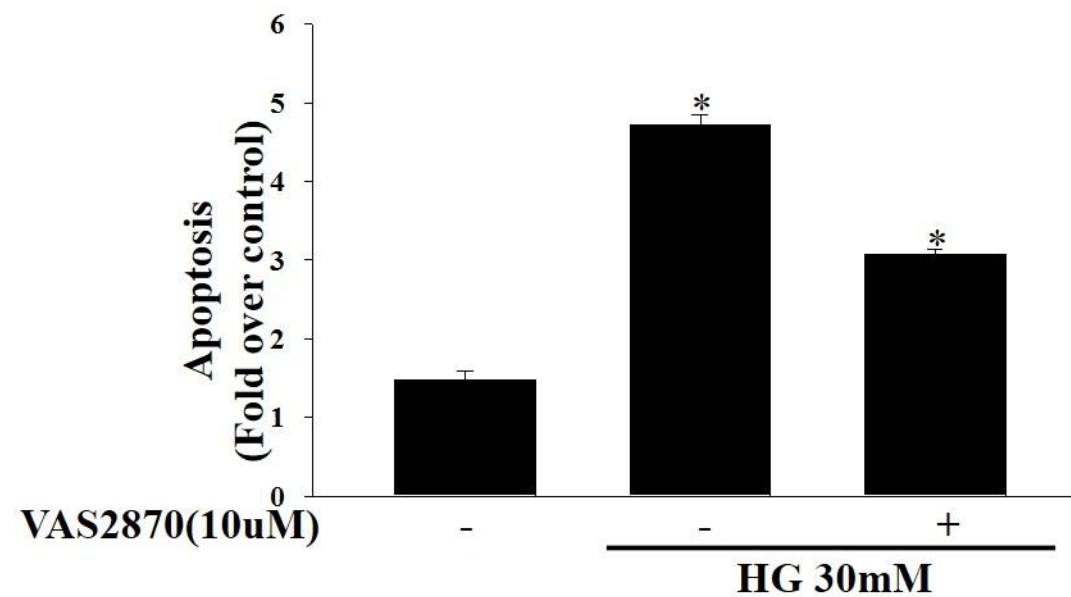

**Supplemental figure-5**

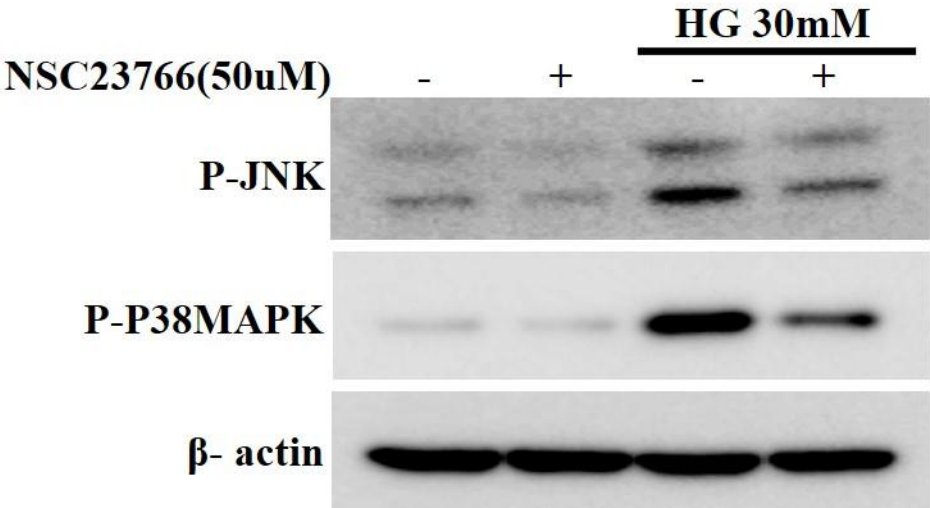

Supplement: mmc1.pdf [file mmc1.pdf]
